# Supplementary material
Source: PubMed Central journal article supplement (PMC4010985)
Supplement: JB.01546-14_zjb999093167so1.pdf [file JB.01546-14_zjb999093167so1.pdf]

Fig. S1

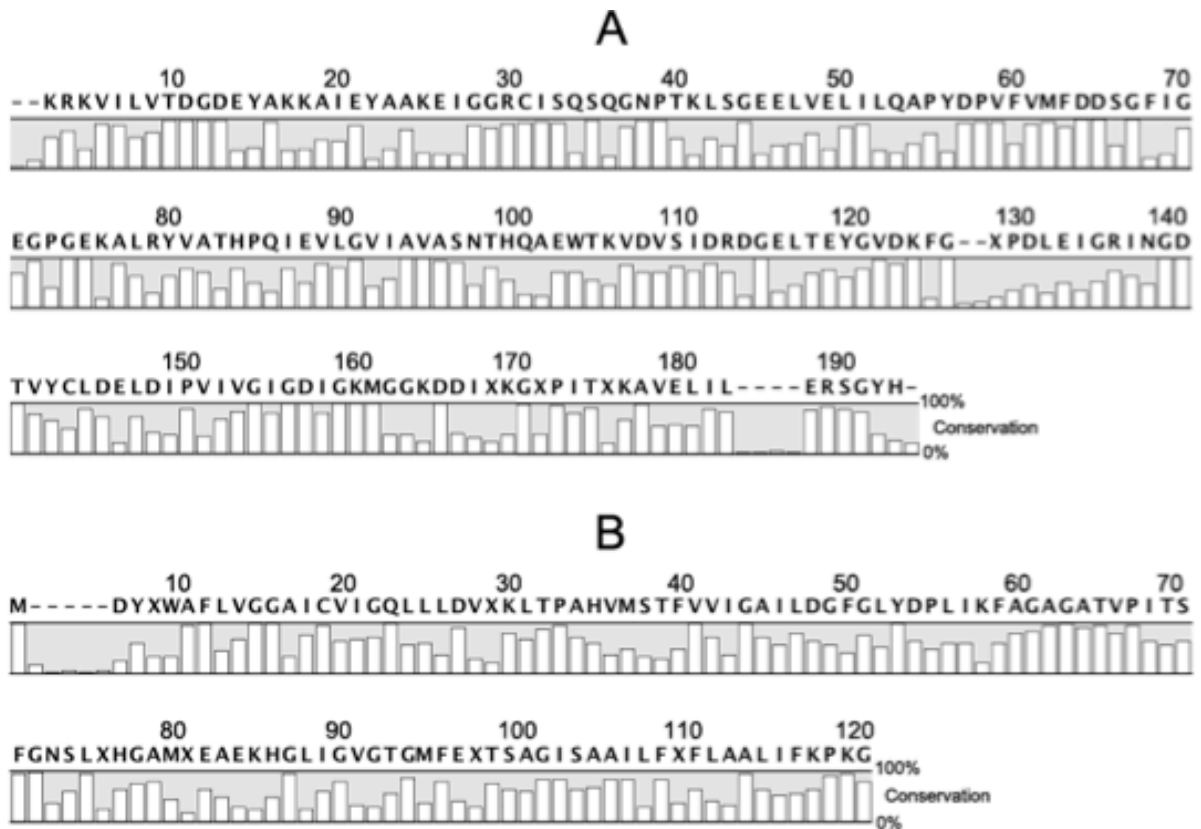

Fig. S1A,B. Conservation of the amino acid sequences of A) SpoVAEa and B) SpoVAEb in different species of the *Bacillales* and *Clostridiales* orders. Sequences of A) SpoVAEa and B) SpoVAEb in the genomes of species in the *Bacillales* and *Clostridiales* orders listed in Tables S1 and S2 were compared using the *B. subtilis* proteins' sequences shown in the figures as query sequences for an initial BLAST search on the NCBI genomic BLAST server; the translation initiating amino acid is shown for SpoVAEb but not shown for SpoVAEa, and is not taken into account in the numbering of residues. An alignment of the selected SpoVAEa and SpoVAEb homologs was performed using CLC

Main Workbench 6.9, and the conservation is shown in comparison to the *B. subtilis* sequences with relative levels of sequence conservation for each residue as shown.

**Table S1. Species used in the alignment of SpoVAEa sequences.**

| Species                                 | NCBI Reference Sequence |
|-----------------------------------------|-------------------------|
| <i>Alicyclobacillus acidocaldarius</i>  | ZP_03493816.1           |
| <i>Anoxybacillus flavithermus</i>       | YP_002315371.1          |
| <i>Bacillus amyloliquefaciens</i>       | YP_003920831.1          |
| <i>Bacillus alcalophilus</i>            | EJS96865.1              |
| <i>Bacillus anthracis</i>               | PY_030226.1             |
| <i>Bacillus atrophaeus</i>              | YP_003973859.1          |
| <i>Bacillus azotoformans</i>            | ZP_11315037.1           |
| <i>Bacillus bataviensis</i>             | ZP_11307970.1           |
| <i>Bacillus cellulosilyticus</i>        | ADU30060.1              |
| <i>Bacillus cereus</i>                  | EJV82262.1              |
| <i>Bacillus clausii</i>                 | BAD64334.1              |
| <i>Bacillus coagulans</i>               | AEP02085.1              |
| <i>Bacillus coahuilensis</i>            | ZP_03226570.1           |
| <i>Bacillus cytotoxicus</i>             | ABS22997.1              |
| <i>Bacillus halodurans</i>              | BAB05261.1              |
| <i>Bacillus licheniformis</i>           | EID47371.1              |
| <i>Bacillus macauensis</i>              | EIT86505.1              |
| <i>Bacillus megaterium</i>              | YP_003564829.1          |
| <i>Bacillus mojavenensis</i>            | ZP_10514755.1           |
| <i>Bacillus mycooides</i>               | EEL97907.1              |
| <i>Bacillus pseudofirmus</i>            | ADC51022.1              |
| <i>Bacillus pseudomycooides</i>         | EEM15492.1              |
| <i>Bacillus pumilus</i>                 | ZP_03055607.1           |
| <i>Bacillus subtilis</i>                | ZP_03592104.1           |
| <i>Bacillus thuringiensis</i>           | ADY23232.1              |
| <i>Bacillus vallismortis</i>            | ZP_10507974.1           |
| <i>Brevibacillus laterosporus</i>       | EGP31866.1              |
| <i>Desmospora sp.</i>                   | EGK14224.1              |
| <i>Geobacillus kaustophilus</i>         | YP_148156.1             |
| <i>Geobacillus thermodenitrificans</i>  | YP_001126327.1          |
| <i>Clostridium acetobutylicum</i>       | NP_348918.1             |
| <i>Clostridium clariflavum</i>          | YP_005045742.1          |
| <i>Clostridium arbusti</i>              | ZP_10773829.1           |
| <i>Clostridium thermocellum</i>         | EIC04841.1              |
| <i>Desulfotomaculum carboxydivorans</i> | AEF94903.1              |
| <i>Acetonema longum</i>                 | EGO63654.1              |

All species in this table contain both *spoVAEa* and *spoVAEb* genes.

**Table S2. Species used in the alignment of SpoVAEb sequences**

| Species                                  | NCBI Reference Sequence |
|------------------------------------------|-------------------------|
| <i>Alicyclobacillus hesperidum</i> *     | ZP_10953636.1           |
| <i>Amphibacillus xylanus</i>             | YP_006845536.1          |
| <i>Anoxybacillus flavithermus</i> *      | YP_002315370.1          |
| <i>Bacillus amyloliquefaciens</i> *      | YP_005130890.1          |
| <i>Bacillus anthracis</i> *              | YP_002816854.1          |
| <i>Bacillus cereus</i> *                 | ZP_00236989.1           |
| <i>Bacillus megaterium</i> *             | YP_003564830.1          |
| <i>Bacillus thuringiensis</i> *          | YP_005567651.1          |
| <i>Bacillus subtilis</i> *               | YP_003097759.1          |
| <i>Geobacillus thermodenitrificans</i> * | YP_001126328.1          |
| <i>Clostridium acetobutylicum</i> *      | NP_348919.1             |
| <i>Clostridium botulinum</i>             | YP_001920241.1          |
| <i>Clostridium tetani</i>                | NP_782788.1             |
| <i>Clostridium perfringens</i>           | NP_562961.1             |
| <i>Clostridium cellulovorans</i> *       | YP_003843610.1          |
| <i>Halobacillus halophilus</i>           | YP_006180964.1          |
| <i>Geobacillus kaustophilus</i> *        | YP_146708.1             |
| <i>Kyrpidia tusciae</i>                  | YP_003589673.1          |
| <i>Geobacillus thermoleovorans</i> *     | YP_004983001.1          |
| <i>Lysinibacillus fusiformis</i>         | ZP_18168291.1           |
| <i>Oceanobacillus iheyensis</i>          | NP_692300.1             |
| <i>Ornithinibacillus scapharcae</i>      | ZP_08785617.1           |
| <i>Paenibacillus alvei</i>               | ZP_10865316.1           |
| <i>Paenibacillus curdolanolyticus</i>    | ZP_07385551.1           |
| <i>Solibacillus silvestris</i>           | YP_006463786.1          |
| <i>Thermobacillus composti</i>           | ZP_08919581.1           |

The asterisk indicates that these species contain both *spoVAEa* and *spoVAEb* genes, while species without an asterisk contain only *spoVAEb*.
